# Supplementary material for: 3D-phosphorus doped mesoporous graphitic carbon nitride based immunosensor for swine flu detection
Source: Royal Society of Chemistry journal article supplement (doi:10.1039/d2nj03205h), 2022-01-01
Supplement: d2nj03205h1.pdf [file d2nj03205h1.pdf]

## **Supplementary Information**

### **3D phosphorus doped mesoporous graphitic carbon nitride based immunosensor for swine flu detection**

Vishakha Nirbhaya<sup>a</sup>, Yogesh Kumar<sup>a</sup>, Ramesh Chandra<sup>b</sup>, Suveen Kumar<sup>a\*</sup>

<sup>a</sup>Department of Chemistry, University of Delhi, Delhi-110007, India.

<sup>b</sup>Institute of Nano Medical Sciences, University of Delhi, Delhi-110007, India.

\*Corresponding author: [suveendev@gmail.com](mailto:suveendev@gmail.com)

## 1. Reagents and Materials:

Melamine [ $C_3H_6N_6$ ] was purchased from Loba Chemie Pvt. Ltd., cyanuric acid [ $C_3H_3N_3O_3$ ] purchased from GLR innovations, N, N-Dimethylformamide (DMF) [ $C_3H_7NO$ ] was purchased from SRL Pvt. Ltd., Dimethyl sulfoxide (DMSO) was procured from Fisher Scientific. Bovine serum albumin (BSA), 1-(3-(dimethylamino)-propyl)-3-ethylcarbodiimide hydrochloride (EDC) [ $C_8H_{17}N$ ] and L-serine were procured from Sigma-Aldrich. N-hydroxy succinimide (NHS), sodium dihydrogen phosphate dehydrate [ $NaH_2PO_4 \cdot 2H_2O$ ], disodium hydrogen phosphate dihydrate [ $Na_2HPO_4 \cdot 2H_2O$ ], potassium hexacyano ferrate (II) trihydrate [ $K_4(Fe(CN)_6) \cdot 3H_2O$ ], potassium hexacyano ferrate (III) [ $K_3(Fe(CN)_6)$ ] and sodium chloride [ $NaCl$ ] were procured from Merck Life Science Pvt. Ltd. Phosphate buffer saline (PBS) solutions of different pH were prepared using 0.2 M  $NaH_2PO_4 \cdot 2H_2O$  and 0.2 M  $Na_2HPO_4 \cdot 2H_2O$  with NaCl using deionized water. Serum Amyloid A monoclonal antibody (anti-SAA) and Serum Amyloid A (SAA) protein biomolecules were purchased from Wuhan Xinqidi Biological Technology Co., Ltd. (Wuhan, China). All the chemicals were of analytical grade and were used without any purification. All electrochemical studies were conducted in triplicate.

## 1.2 Instrumentations

The structural, morphological and surface characterization was carried out via X-ray diffraction studies (XRD; Rigaku Miniflex 600), Scanning electron microscope (SEM; JEOL JSM 6610LV, Japan), Field emission scanning electron microscope (FESEM; Zeiss Gemini), Transmission electron microscope (TEM; FEI Tecnai G220 S-Twin), and Fourier transform infrared spectroscopy (FT-IR; Nicolet iS50), Brunauer-Emmett-Teller (BET) theory studies (Micromeritics Instrument Corp.). The electrochemical measurements were performed on an Autolab Potentiostat Galvanostat (AUT204 Netherlands).

**Table S1:** BET surface areas and average pore size of g-C<sub>3</sub>N<sub>4</sub> and P-C<sub>3</sub>N<sub>4</sub>.

| Surface Analysis parameter/<br>Compound Name |                                        | g-C <sub>3</sub> N <sub>4</sub> | P-g-C <sub>3</sub> N <sub>4</sub> |
|----------------------------------------------|----------------------------------------|---------------------------------|-----------------------------------|
| Surface Area<br>(m <sup>2</sup> /g)          | BET Surface Area                       | 114.5                           | 92.65                             |
| Pore Volume<br>(cm <sup>3</sup> /g)          | Adsorption<br>&<br>Desorption          | 0.154656                        | 0.204753                          |
|                                              |                                        | 0.207379                        | 0.208754                          |
| Pore Size<br>(nm)                            | Adsorption<br>&<br>Desorption          | 6.57                            | 8.63                              |
|                                              |                                        | 5.83                            | 8.62                              |
|                                              | average pore diameter<br>(4V/A by BET) | 5.5                             | 8.59                              |
|                                              | Mean pore size                         | 2.34                            | 2.6                               |

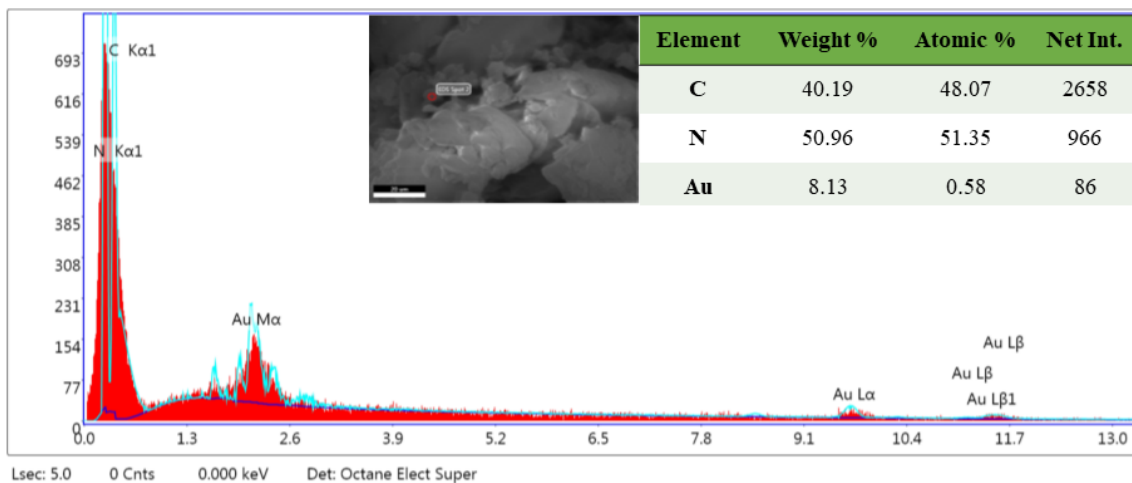

**Figure S1:** Energy dispersive X-Ray spectroscopy results of g-C<sub>3</sub>N<sub>4</sub>.

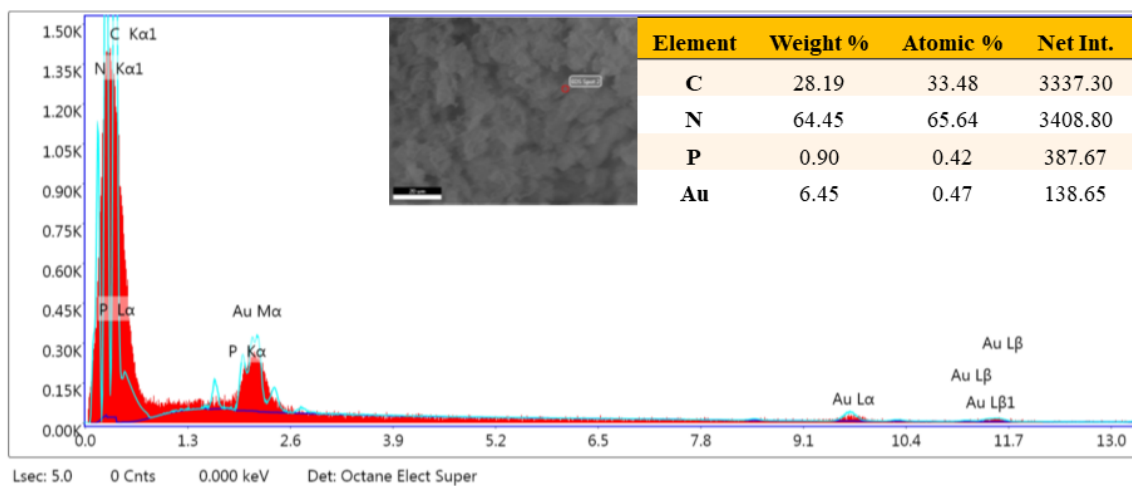

**Figure S2:** Energy dispersive X-Ray spectroscopy results of P-g-C<sub>3</sub>N<sub>4</sub>.

**Table S2:** List of Heterogenous electron transfer rate (HET  $k^0$ ) of the fabricated electrodes.

| S. No. | Electrode                              | $R_{ct}$ ( $\Omega$ ) | HET rate ( $k^0$ ) <sup>i</sup> ( $\text{cm s}^{-1}$ ) |
|--------|----------------------------------------|-----------------------|--------------------------------------------------------|
| 1.     | g- $\text{C}_3\text{N}_4/\text{ITO}$   | 132.7                 | $1.605 \times 10^{-6}$                                 |
| 2.     | P-g- $\text{C}_3\text{N}_4/\text{ITO}$ | 66.8                  | $3.18 \times 10^{-6}$                                  |

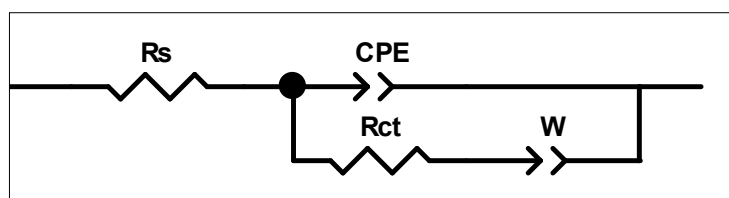

**Figure S3:** Randles equivalent circuit model

<sup>i</sup> HET = Heterogenous electron transfer rate ( $k^0$ ),

$$R_{ct} = \frac{RT}{n^2 F^2 A k^0 C}$$

where,  $R$  = molar gas constant,  $T$  = temperature,  $n$  = number of electrons ( $n = 1$ ),  $F$  = Faraday constant,  $A$  = active surface area of the electrode,  $C$  = concentration of the electroactive species and  $R_{ct}$  = charge transfer resistance of electrode surface.

$R_s$  = resistance of solution, CPE = constant phase element and  $W$  = Warburg impedance.

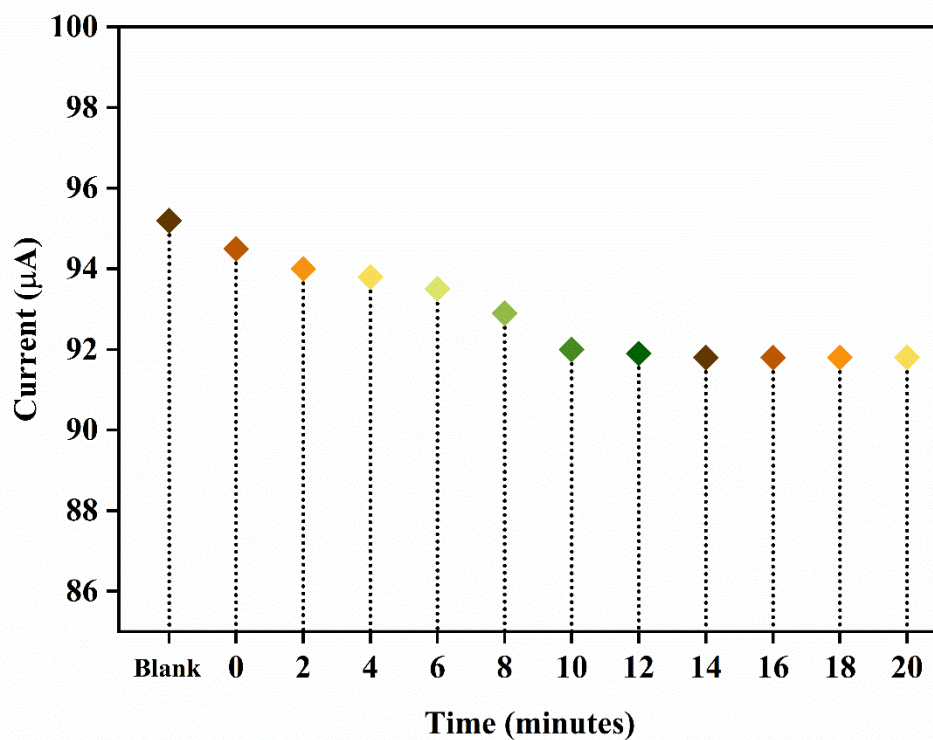

**Figure S4:** Incubation study plot of peak current ( $\mu\text{A}$ ) vs time (min.) for BSA/anti-SAA/Ser/P-g- $\text{C}_3\text{N}_4$ /ITO bioelectrode against SAA protein using DPV technique.

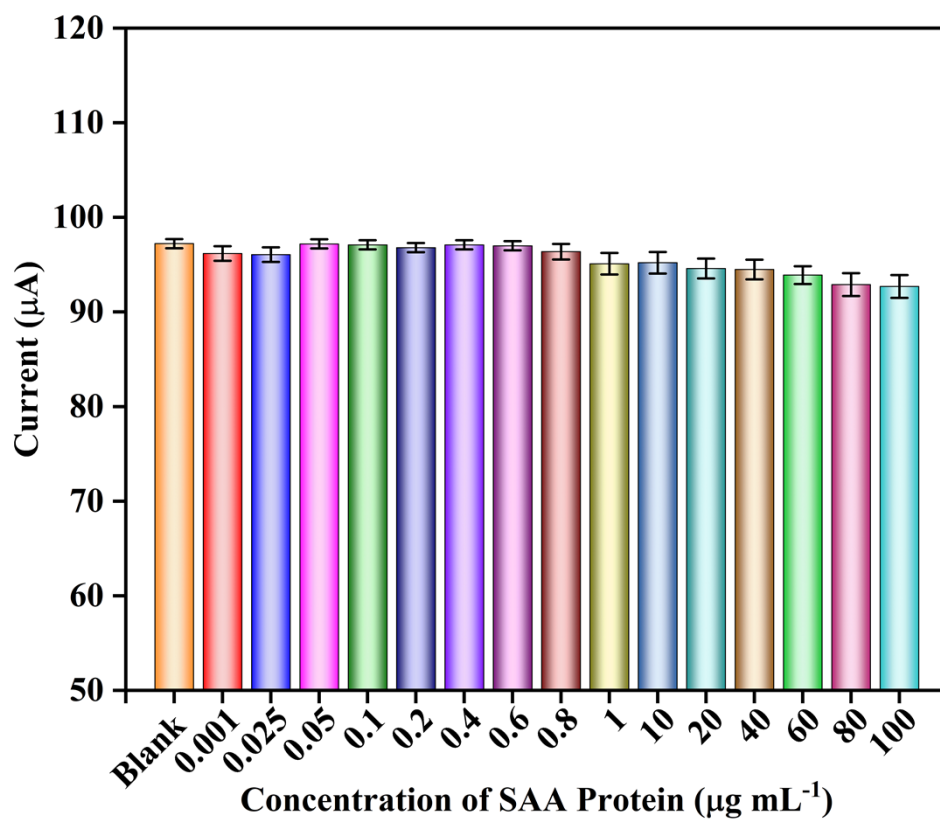

**Figure S5:** Control study plot of peak current ( $\mu\text{A}$ ) vs concentration of SAA protein ( $10 \text{ ng mL}^{-1}$ - $100 \mu\text{g mL}^{-1}$ ) for Ser/P-g- $\text{C}_3\text{N}_4$ /ITO electrode using DPV technique.



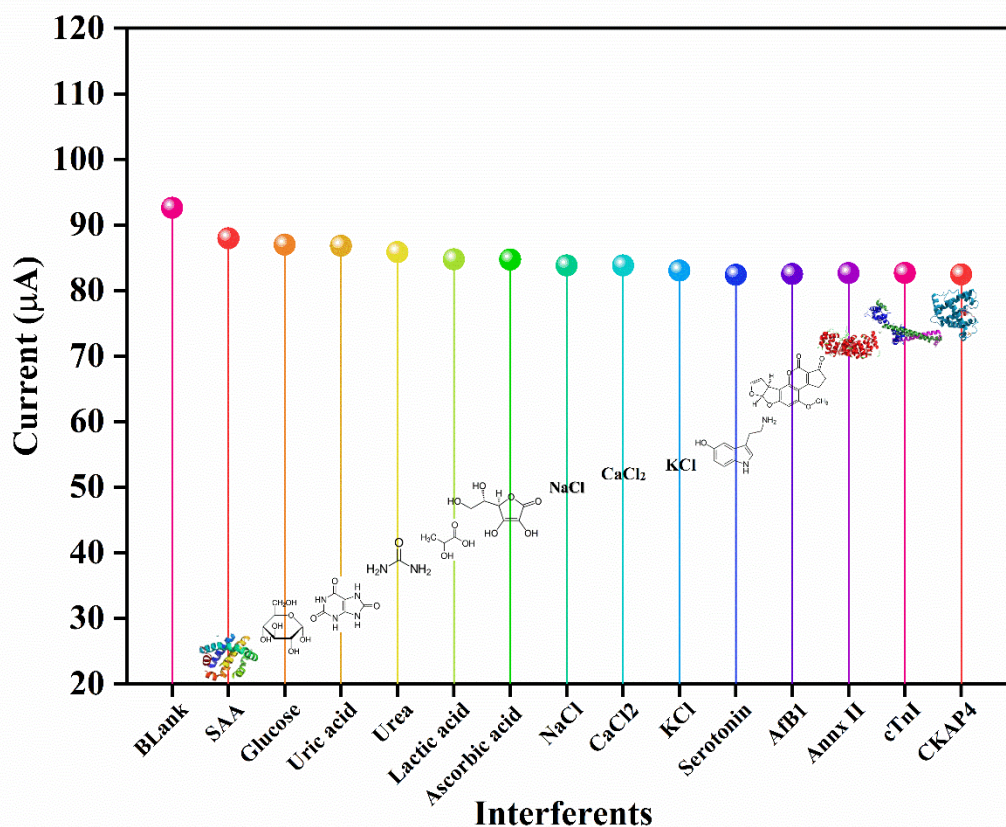

**Figure S6:** Interferent study plot of peak current ( $\mu\text{A}$ ) vs various analytes present in the human blood sample (SAA = serum amyloid A, glucose, uric acid, urea, lactic acid, ascorbic acid, NaCl, CaCl<sub>2</sub>, KCl, serotonin, AFB1= Aflatoxin B1, Annx II= Annexin A2, cTnI = cardiac troponin I and CKAP4= Cytoskeleton-associated protein 4) for BSA/anti-SAA/Ser/P-g-C<sub>3</sub>N<sub>4</sub>/ITO bioelectrode using DPV technique.

### Studies of T-test calculation for interferent studies:

The statistical comparison of the interferent studies were determined using the t-test and p-test. Therefore, we have obtained a confidence level of 95% and its calculation are as follows:

**Table S3:** Data values for interferent study:

| S. No. | Interferents                                     | Peak current (I <sub>p</sub> / μA) | %RSD                     |
|--------|--------------------------------------------------|------------------------------------|--------------------------|
| 1.     | Blank electrode                                  | 92.6                               | -                        |
| 2.     | Serum Amyloid A (SAA)                            | 87.9                               | 0                        |
| 3.     | Glucose                                          | 87.0                               | 0.73                     |
| 4.     | Uric Acid                                        | 86.8                               | 0.86                     |
| 5.     | Urea                                             | 85.8                               | 1.71                     |
| 6.     | Lactic Acid                                      | 84.7                               | 2.62                     |
| 7.     | Ascorbic Acid                                    | 84.7                               | 2.62                     |
| 8.     | NaCl                                             | 83.8                               | 3.38                     |
| 9.     | CaCl <sub>2</sub>                                | 83.8                               | 3.38                     |
| 10.    | KCl                                              | 83.04                              | 4.02                     |
| 11.    | Serotonin                                        | 82.4                               | 4.57                     |
| 12.    | AfB1                                             | 82.5                               | 4.48                     |
| 13.    | Annexin II                                       | 82.6                               | 4.4                      |
| 14.    | cTnI                                             | 82.7                               | 4.31                     |
| 15.    | CKP4                                             | 82.4                               | 4.57                     |
|        | <b>Mean I<sub>p</sub> (<math>\bar{x}</math>)</b> | <b>84.8</b>                        | <b>Average %RSD 2.97</b> |

We chose the null hypothesis  $H_0 = \mu = 80$

Alternate hypothesis  $\mu \neq 80$

To calculate t-score using eq. S1

$$t = \frac{\bar{x} - \mu}{\sigma/\sqrt{N}} \quad \dots\dots\dots \text{eq. S1}$$

where  $\mu$  = Population means

$\bar{x}$  = Mean I<sub>p</sub>

$\sigma$  = Standard deviation of samples (i.e., Interferents)

N = No. of samples

Calculated sample standard deviation according to eq. S2

$$\sigma = \sqrt{\frac{1}{N-1} \sum_{i=1}^N (x_i - \bar{x})^2} \quad \dots\dots\dots \text{eq. S2}$$

$$\sigma = 2.725$$

$$\begin{aligned} \text{Standard error of mean (SEM)} \quad \sigma_{\bar{x}} &= \frac{\sigma}{\sqrt{N}} \\ &= 0.7037 \end{aligned}$$

Based on the SEM, a confidence level of 95% (or statistical significance of 5%) is typically used for the data representation.

In the given data,

$$\bar{x} = 84.8; \quad \sigma = 2.725; \quad \mu = 80; \quad N = 15$$

Using eq. S1,

$$t = \frac{(\bar{x} - \mu)}{\sigma/\sqrt{N}}$$

$$t = \frac{84.8 - 80}{2.725/\sqrt{15}}$$

$$t\text{-score} = 6.82$$

In denominator N-1 for sample, but for population it will be N.

Now to calculate or find p value,

- (i) one-tailed t test was applied to check whether  $\mu > 80$  or not.
- (ii) Two tailed test is used to check symmetrical distribution

So, for p test

$$\text{Degree of freedom} = N-1 = 14$$

$$\text{Significance level} = 0.05$$

$$t \text{ score} = 6.82$$

By checking t-table for DOF= 14 and significance level = 0.05, we have found

$$t\text{-value} = \pm 2.145 \text{ (for two tailed)}$$

or

$$= 1.761 \text{ (for one tailed)}$$

On comparing t score > t test value at 0.05 significant level.

(The p value is less than the significant level:  $p < 0.05$ . we can reject the null hypothesis with 95% confidence level that there is no difference between means).

So, we can say with 95% confidence level that our null hypothesis is wrong and mean of sample is greater than  $\mu > 80$ .

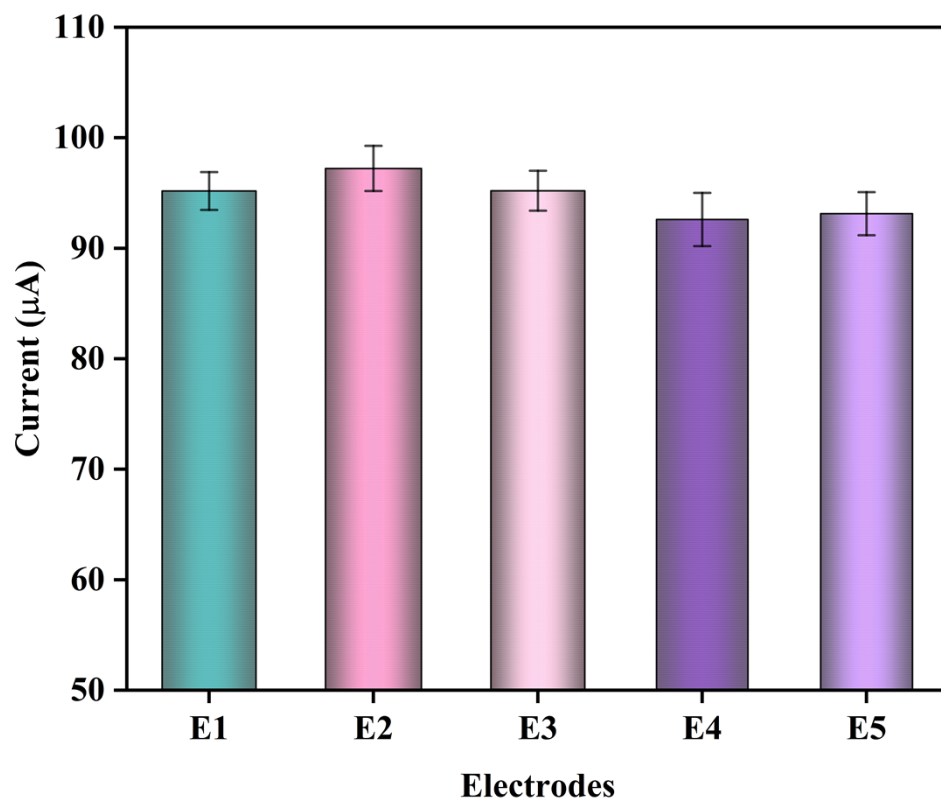

**Figure S7:** The bar graph of peak current ( $\mu\text{A}$ ) vs electrodes for DPV response of five different fabricated BSA/anti-SAA/Ser/P-g- $\text{C}_3\text{N}_4$ /ITO bioelectrodes recorded under optimized experimental condition using DPV technique.

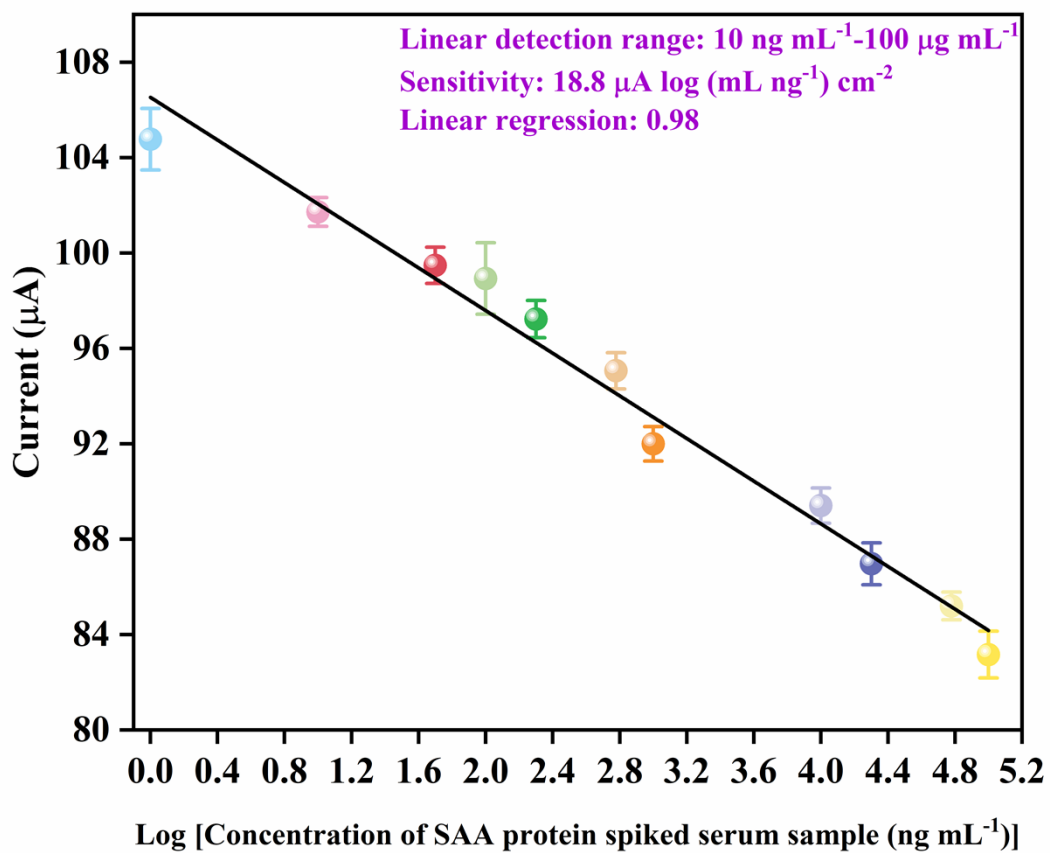

**Figure S8:** Calibration plot of peak current ( $\mu\text{A}$ ) vs log of concentration of SAA protein ( $\text{ng mL}^{-1}$ ) spiked serum samples for BSA/anti-SAA/Ser/P-g- $\text{C}_3\text{N}_4$ /ITO bioelectrode using DPV technique.

**Table S4:** The bar graph for comparison of peak current ( $\mu\text{A}$ ) standard SAA protein sample and SAA protein spiked serum samples

| S. No.              | Concentration of SAA protein ( $\text{ng mL}^{-1}$ ) | Peak current ( $\mu\text{A}$ ) |                              | % RSD       |
|---------------------|------------------------------------------------------|--------------------------------|------------------------------|-------------|
|                     |                                                      | SAA (in standard sample)       | SAA (in spiked serum sample) |             |
| 1.                  | Blank                                                | 99.4                           | 104.77                       | 3.72        |
| 2.                  | 10                                                   | 98.5                           | 101.72                       | 2.28        |
| 3.                  | 50                                                   | 95.73                          | 99.48                        | 2.72        |
| 4.                  | 100                                                  | 92.89                          | 98.93                        | 4.45        |
| 5.                  | 200                                                  | 91.49                          | 97.23                        | 4.30        |
| 6.                  | 600                                                  | 89.13                          | 95.06                        | 4.55        |
| 7.                  | 1000                                                 | 84.62                          | 91.58                        | 5.58        |
| 8.                  | 10000                                                | 81.84                          | 89.41                        | 6.25        |
| 9.                  | 20000                                                | 79.71                          | 86.97                        | 6.16        |
| 10.                 | 60000                                                | 76.5                           | 85.2                         | 7.60        |
| 11.                 | 100000                                               | 74.21                          | 83.16                        | 8.04        |
| <b>Average %RSD</b> |                                                      |                                |                              | <b>5.06</b> |
